# Supplementary material
Source: PubMed Central journal article supplement (PMC1859927)

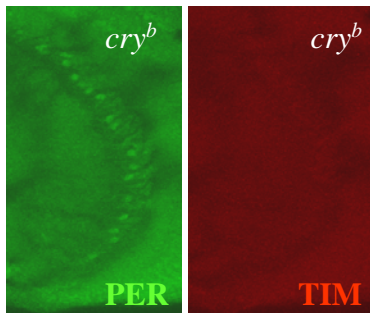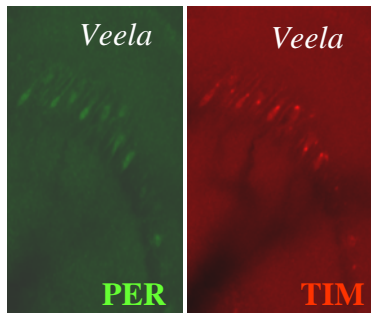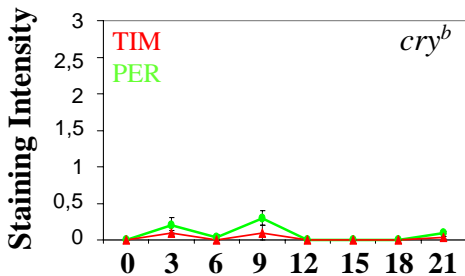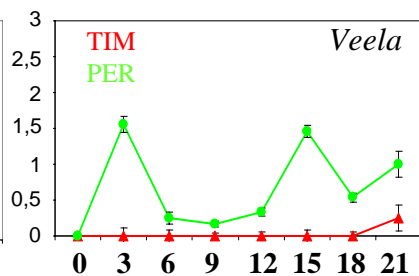

**Circadian Time**

Supplement: pnas_0606675103_2.pdf [file pnas_0606675103_2.pdf]

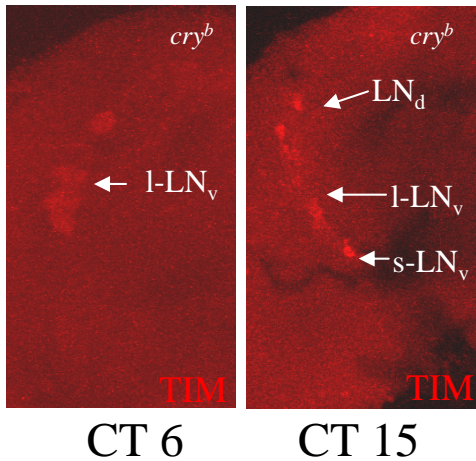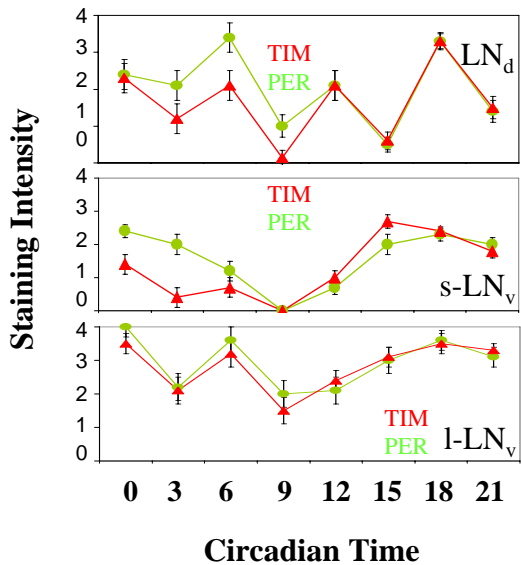

Supplement: pnas_0606675103_3.pdf [file pnas_0606675103_3.pdf]
